# Supplementary material for: Biomimetic synthesis of microporous and mesoporous materials at room temperature and neutral pH, with application in electronics, controlled release of chemicals, and catalysis
Source: Royal Society of Chemistry journal article supplement (doi:10.1039/b808697b), 2008-01-01

## Supplementary Material

**Figure S1.** SEM images of the microporous samples obtained by bioinspired methodology. There are aggregates of no definite size and shape.

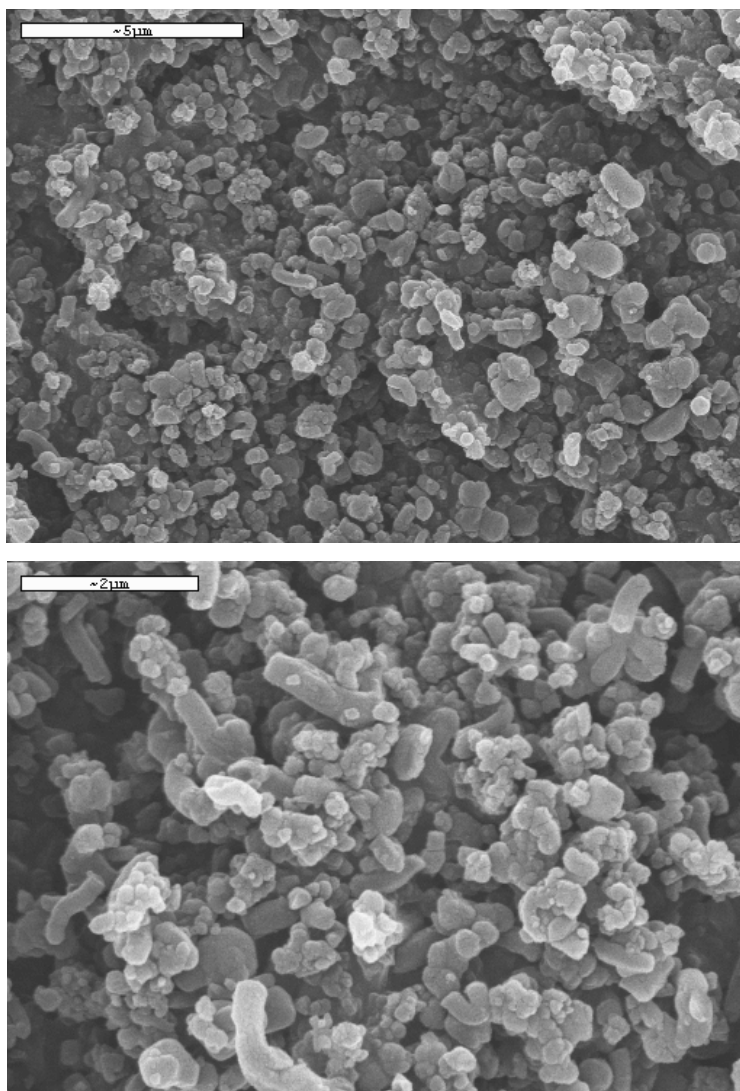

**Figure S2:** XRD of the lamellar phase of the MCM family (MCM-50). The XRD pattern was taken from the reference: *Chem. Mat.*, **1996**, *8*, 1147-1160.

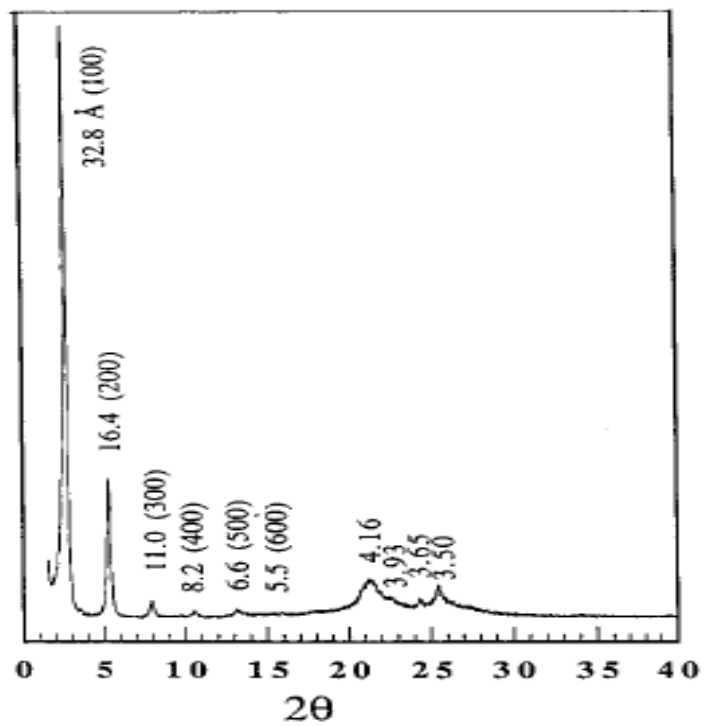

Supplement: b808697b.pdf [file b808697b.pdf]
